# Supplementary material for: Investigation of cold-resistance mechanisms in cryophylactic yeast Metschnikowia pulcherrima based on comparative transcriptome analysis
Source: Front Microbiol. 2024 Sep 25;15:1476087. doi: 10.3389/fmicb.2024.1476087 (PMC11462854; doi:10.3389/fmicb.2024.1476087)
Supplement: Supplementary file 5 [file Table_5.XLSX]

## Sheet: Table S8-1
Table S8-1 Kyoto Encyclopedia of Genes and Genomes (KEGG) annotation of differentially expressed genes in MS612 (MS5_6h_vs_MS20_6h)
Pathway ID	Description	Number	Ratio_in_study	Ratio_in_pop	Pvalue	Padjust	First Category	Second Category
map00010	Glycolysis / Gluconeogenesis	8	8/33	41/3299	3.07255e-09	7.68137e-08	Metabolism	Carbohydrate metabolism
map00051	Fructose and mannose metabolism	5	5/33	17/3299	4.15376e-07	5.1922e-06	Metabolism	Carbohydrate metabolism
map00680	Methane metabolism	5	5/33	22/3299	1.70593e-06	1.4216e-05	Metabolism	Energy metabolism
map00030	Pentose phosphate pathway	4	4/33	23/3299	6.43156e-05	0.000401972	Metabolism	Carbohydrate metabolism
map04217	Necroptosis	3	3/33	18/3299	0.000672063	0.00336032	Cellular Processes	Cell growth and death
map00564	Glycerophospholipid metabolism	3	3/33	43/3299	0.00857367	0.0306202	Metabolism	Lipid metabolism
map00052	Galactose metabolism	2	2/33	14/3299	0.00819228	0.0341345	Metabolism	Carbohydrate metabolism
map00561	Glycerolipid metabolism	2	2/33	28/3299	0.0311912	0.0974726	Metabolism	Lipid metabolism
map00780	Biotin metabolism	1	1/33	4/3299	0.0394334	0.0985835	Metabolism	Metabolism of cofactors and vitamins
map00500	Starch and sucrose metabolism	2	2/33	31/3299	0.0376644	0.104623	Metabolism	Carbohydrate metabolism
map00565	Ether lipid metabolism	1	1/33	8/3299	0.0773572	0.175812	Metabolism	Lipid metabolism
map00061	Fatty acid biosynthesis	1	1/33	9/3299	0.0866088	0.180435	Metabolism	Lipid metabolism
map03018	RNA degradation	2	2/33	53/3299	0.0975139	0.187527	Genetic Information Processing	Folding, sorting and degradation
map00730	Thiamine metabolism	1	1/33	13/3299	0.122724	0.21915	Metabolism	Metabolism of cofactors and vitamins
map00360	Phenylalanine metabolism	1	1/33	21/3299	0.190847	0.280657	Metabolism	Amino acid metabolism
map00562	Inositol phosphate metabolism	1	1/33	20/3299	0.182621	0.304368	Metabolism	Carbohydrate metabolism
map00900	Terpenoid backbone biosynthesis	1	1/33	20/3299	0.182621	0.304368	Metabolism	Metabolism of terpenoids and polyketides
map04011	MAPK signaling pathway - yeast	2	2/33	95/3299	0.245514	0.340992	Environmental Information Processing	Signal transduction
map00520	Amino sugar and nucleotide sugar metabolism	1	1/33	33/3299	0.283509	0.373039	Metabolism	Carbohydrate metabolism
map05165	Human papillomavirus infection	1	1/33	38/3299	0.319004	0.398755	Human Diseases	Infectious diseases: Viral
map00260	Glycine, serine and threonine metabolism	1	1/33	38/3299	0.319004	0.398755	Metabolism	Amino acid metabolism
map00620	Pyruvate metabolism	1	1/33	44/3299	0.35935	0.408353	Metabolism	Carbohydrate metabolism
map00240	Pyrimidine metabolism	1	1/33	70/3299	0.508965	0.553223	Metabolism	Nucleotide metabolism
map04113	Meiosis - yeast	1	1/33	79/3299	0.552379	0.575395	Cellular Processes	Cell growth and death
map00230	Purine metabolism	1	1/33	99/3299	0.635944	0.635944	Metabolism	Nucleotide metabolism

## Sheet: Table S8-2
Table S8-2 Kyoto Encyclopedia of Genes and Genomes (KEGG) annotation of differentially expressed genes in MS612 (MS5_24h_vs_MS20_24h)
Pathway ID	Description	Number	Ratio_in_study	Ratio_in_pop	Pvalue	Padjust	First Category	Second Category
map00010	Glycolysis / Gluconeogenesis	6	6/89	41/3299	0.000684564	0.0328591	Metabolism	Carbohydrate metabolism
map00360	Phenylalanine metabolism	4	4/89	21/3299	0.00208481	0.0500354	Metabolism	Amino acid metabolism
map04111	Cell cycle - yeast	8	8/89	97/3299	0.00414822	0.0663716	Cellular Processes	Cell growth and death
map00240	Pyrimidine metabolism	6	6/89	70/3299	0.0106824	0.0732505	Metabolism	Nucleotide metabolism
map00561	Glycerolipid metabolism	4	4/89	28/3299	0.00617584	0.0741101	Metabolism	Lipid metabolism
map03030	DNA replication	4	4/89	32/3299	0.0099933	0.0799464	Genetic Information Processing	Replication and repair
map00100	Steroid biosynthesis	3	3/89	17/3299	0.00981452	0.0942194	Metabolism	Lipid metabolism
map03430	Mismatch repair	3	3/89	21/3299	0.0177621	0.0947311	Genetic Information Processing	Replication and repair
map00230	Purine metabolism	7	7/89	99/3299	0.0163265	0.0979591	Metabolism	Nucleotide metabolism
map00254	Aflatoxin biosynthesis	1	1/89	1/3299	0.0269779	0.117722	Metabolism	Biosynthesis of other secondary metabolites
map00640	Propanoate metabolism	3	3/89	24/3299	0.0255079	0.122438	Metabolism	Carbohydrate metabolism
map04011	MAPK signaling pathway - yeast	6	6/89	95/3299	0.0415325	0.132904	Environmental Information Processing	Signal transduction
map00650	Butanoate metabolism	2	2/89	11/3299	0.033791	0.135164	Metabolism	Carbohydrate metabolism
map00040	Pentose and glucuronate interconversions	2	2/89	12/3299	0.039849	0.136625	Metabolism	Carbohydrate metabolism
map04213	Longevity regulating pathway - multiple species	3	3/89	28/3299	0.0382286	0.141152	Organismal Systems	Aging
map00909	Sesquiterpenoid and triterpenoid biosynthesis	1	1/89	2/3299	0.0532359	0.150313	Metabolism	Metabolism of terpenoids and polyketides
map00052	Galactose metabolism	2	2/89	14/3299	0.0530683	0.159205	Metabolism	Carbohydrate metabolism
map00280	Valine, leucine and isoleucine degradation	2	2/89	16/3299	0.0676023	0.180273	Metabolism	Amino acid metabolism
map00051	Fructose and mannose metabolism	2	2/89	17/3299	0.0753074	0.19025	Metabolism	Carbohydrate metabolism
map00410	beta-Alanine metabolism	2	2/89	18/3299	0.083277	0.199865	Metabolism	Metabolism of other amino acids
map00780	Biotin metabolism	1	1/89	4/3299	0.103668	0.236955	Metabolism	Metabolism of cofactors and vitamins
map00680	Methane metabolism	2	2/89	22/3299	0.117423	0.245057	Metabolism	Energy metabolism
map00620	Pyruvate metabolism	3	3/89	44/3299	0.114073	0.248887	Metabolism	Carbohydrate metabolism
map00480	Glutathione metabolism	2	2/89	25/3299	0.144935	0.28987	Metabolism	Metabolism of other amino acids
map00430	Taurine and hypotaurine metabolism	1	1/89	7/3299	0.174376	0.310002	Metabolism	Metabolism of other amino acids
map04113	Meiosis - yeast	4	4/89	79/3299	0.162893	0.312754	Cellular Processes	Cell growth and death
map00250	Alanine, aspartate and glutamate metabolism	2	2/89	28/3299	0.173624	0.320536	Metabolism	Amino acid metabolism
map00500	Starch and sucrose metabolism	2	2/89	31/3299	0.203139	0.33623	Metabolism	Carbohydrate metabolism
map00565	Ether lipid metabolism	1	1/89	8/3299	0.196697	0.337195	Metabolism	Lipid metabolism
map00520	Amino sugar and nucleotide sugar metabolism	2	2/89	33/3299	0.223123	0.345481	Metabolism	Carbohydrate metabolism
map00061	Fatty acid biosynthesis	1	1/89	9/3299	0.218421	0.349474	Metabolism	Lipid metabolism
map00514	Other types of O-glycan biosynthesis	1	1/89	12/3299	0.280168	0.420252	Metabolism	Glycan biosynthesis and metabolism
map00860	Porphyrin and chlorophyll metabolism	1	1/89	17/3299	0.372537	0.541872	Metabolism	Metabolism of cofactors and vitamins
map04217	Necroptosis	1	1/89	18/3299	0.389552	0.549956	Cellular Processes	Cell growth and death
map00380	Tryptophan metabolism	1	1/89	18/3299	0.389552	0.549956	Metabolism	Amino acid metabolism
map03410	Base excision repair	1	1/89	18/3299	0.389552	0.549956	Genetic Information Processing	Replication and repair
map00030	Pentose phosphate pathway	1	1/89	23/3299	0.468021	0.607162	Metabolism	Carbohydrate metabolism
map00630	Glyoxylate and dicarboxylate metabolism	1	1/89	24/3299	0.482473	0.60944	Metabolism	Carbohydrate metabolism
map00330	Arginine and proline metabolism	1	1/89	26/3299	0.510223	0.627967	Metabolism	Amino acid metabolism
map00270	Cysteine and methionine metabolism	1	1/89	40/3299	0.667311	0.762641	Metabolism	Amino acid metabolism
map00564	Glycerophospholipid metabolism	1	1/89	43/3299	0.693838	0.774516	Metabolism	Lipid metabolism
map05165	Human papillomavirus infection	1	1/89	38/3299	0.648377	0.778052	Human Diseases	Infectious diseases: Viral
map03420	Nucleotide excision repair	1	1/89	38/3299	0.648377	0.778052	Genetic Information Processing	Replication and repair
map04144	Endocytosis	1	1/89	65/3299	0.833933	0.909745	Cellular Processes	Transport and catabolism
map03040	Spliceosome	1	1/89	77/3299	0.881259	0.919575	Genetic Information Processing	Transcription
map04141	Protein processing in endoplasmic reticulum	1	1/89	77/3299	0.881259	0.919575	Genetic Information Processing	Folding, sorting and degradation
map04138	Autophagy - yeast	1	1/89	76/3299	0.877887	0.936413	Cellular Processes	Transport and catabolism
map03010	Ribosome	1	1/89	123/3299	0.967566	0.967566	Genetic Information Processing	Translation

## Sheet: Table S8-3
Table S8-3 Kyoto Encyclopedia of Genes and Genomes (KEGG) annotation of differentially expressed genes in MS612 (MS-5_6h_vs_MS20_6h)
Pathway ID	Description	Number	Ratio_in_study	Ratio_in_pop	Pvalue	Padjust	First Category	Second Category
map04141	Protein processing in endoplasmic reticulum	5	5/98	46/3299	8.23314e-06	7.15926e-05	Genetic Information Processing	Folding, sorting and degradation
map00053	Ascorbate and aldarate metabolism	3	3/98	3/3299	0.000113653	0.0011898	Metabolism	Carbohydrate metabolism
map03030	DNA replication	5	5/98	32/3299	0.000139092	0.00128548	Genetic Information Processing	Replication and repair
map04111	Cell cycle - yeast	4	4/98	97/3299	0.000265594	0.00189694	Cellular Processes	Cell growth and death
map00010	Glycolysis / Gluconeogenesis	6	6/98	41/3299	0.000141547	0.00629546	Metabolism	Carbohydrate metabolism
map00260	Glycine, serine and threonine metabolism	2	2/98	38/3299	0.00481476	0.0228701	Metabolism	Amino acid metabolism
map04138	Autophagy - yeast	3	3/98	76/3299	0.00501602	0.0227702	Cellular Processes	Transport and catabolism
map00630	Glyoxylate and dicarboxylate metabolism	3	3/98	24/3299	0.00526301	0.0228992	Metabolism	Carbohydrate metabolism
map00561	Glycerolipid metabolism	3	3/98	28/3299	0.00571686	0.0208394	Metabolism	Lipid metabolism
map00750	Vitamin B6 metabolism	3	3/98	8/3299	0.00614558	0.0209661	Metabolism	Metabolism of cofactors and vitamins
map00254	Aflatoxin biosynthesis	1	1/98	1/3299	0.029706	0.0996024	Metabolism	Biosynthesis of other secondary metabolites
map00791	Atrazine degradation	1	1/98	1/3299	0.029706	0.0996024	Metabolism	Xenobiotics biodegradation and metabolism
map00650	Butanoate metabolism	4	4/98	11/3299	0.0503472	0.121042	Metabolism	Carbohydrate metabolism
map00460	Cyanoamino acid metabolism	2	2/98	8/3299	0.0569205	0.130821	Metabolism	Metabolism of other amino acids
map03010	Ribosome	3	3/98	123/3299	0.0575659	0.137566	Genetic Information Processing	Translation
map04213	Longevity regulating pathway - multiple species	2	2/98	28/3299	0.0582286	0.141152	Organismal Systems	Aging
map03430	Mismatch repair	3	3/98	21/3299	0.0583543	0.191223	Genetic Information Processing	Replication and repair
map00040	Pentose and glucuronate interconversions	2	2/98	12/3299	0.0593041	0.195179	Metabolism	Carbohydrate metabolism
map04070	Phosphatidylinositol signaling system	2	2/98	19/3299	0.063513	0.20281	Environmental Information Processing	Signal transduction
map00340	Histidine metabolism	1	1/98	18/3299	0.0667147	0.203109	Metabolism	Amino acid metabolism
map00310	Lysine degradation	2	2/98	15/3299	0.0764485	0.203709	Metabolism	Amino acid metabolism
map00280	Valine, leucine and isoleucine degradation	1	1/98	16/3299	0.0800124	0.207305	Metabolism	Amino acid metabolism
map00564	Glycerophospholipid metabolism	3	3/98	43/3299	0.0828873	0.230915	Metabolism	Lipid metabolism
map00730	Thiamine metabolism	1	1/98	13/3299	0.087625	0.246064	Metabolism	Metabolism of cofactors and vitamins
map00051	Fructose and mannose metabolism	2	2/98	17/3299	0.0879046	0.248245	Metabolism	Carbohydrate metabolism
map00680	Methane metabolism	2	2/98	22/3299	0.113549	0.218393	Metabolism	Energy metabolism
map00350	Tyrosine metabolism	1	1/98	20/3299	0.117468	0.257527	Metabolism	Amino acid metabolism
map04011	MAPK signaling pathway - yeast	1	1/98	35/3299	0.150151	0.316986	Environmental Information Processing	Signal transduction
map00020	Citrate cycle (TCA cycle)	1	1/98	25/3299	0.168948	0.332069	Metabolism	Carbohydrate metabolism
map00910	Nitrogen metabolism	1	1/98	6/3299	0.165628	0.337172	Metabolism	Energy metabolism
map00780	Biotin metabolism	1	1/98	4/3299	0.187763	0.327955	Metabolism	Metabolism of cofactors and vitamins
map00565	Ether lipid metabolism	1	1/98	8/3299	0.214558	0.407661	Metabolism	Lipid metabolism
map00592	alpha-Linolenic acid metabolism	1	1/98	6/3299	0.214478	0.400735	Metabolism	Lipid metabolism
map00450	Selenocompound metabolism	1	1/98	10/3299	0.260647	0.436967	Metabolism	Metabolism of other amino acids
map00600	Sphingolipid metabolism	1	1/98	13/3299	0.324806	0.487209	Metabolism	Lipid metabolism
map00514	Other types of O-glycan biosynthesis	1	1/98	12/3299	0.304057	0.495179	Metabolism	Glycan biosynthesis and metabolism
map00290	Valine, leucine and isoleucine biosynthesis	1	1/98	12/3299	0.304057	0.495179	Metabolism	Amino acid metabolism
map04146	Peroxisome	1	1/98	45/3299	0.341296	0.49753	Cellular Processes	Transport and catabolism
map00061	Fatty acid biosynthesis	1	1/98	8/3299	0.361351	0.501173	Metabolism	Lipid metabolism
map00860	Porphyrin and chlorophyll metabolism	1	1/98	17/3299	0.384027	0.520268	Metabolism	Metabolism of cofactors and vitamins
map04217	Necroptosis	1	1/98	18/3299	0.389552	0.549956	Cellular Processes	Cell growth and death
map00052	Galactose metabolism	1	1/98	14/3299	0.453068	0.59205	Metabolism	Carbohydrate metabolism
map00030	Pentose phosphate pathway	1	1/98	23/3299	0.459021	0.607162	Metabolism	Carbohydrate metabolism
map00620	Pyruvate metabolism	1	1/98	14/3299	0.513132	0.634255	Metabolism	Carbohydrate metabolism
map01040	Biosynthesis of unsaturated fatty acids	1	1/98	16/3299	0.520012	0.707305	Metabolism	Lipid metabolism
map00562	Inositol phosphate metabolism	1	1/98	20/3299	0.6824	0.731028	Metabolism	Carbohydrate metabolism
map03420	Nucleotide excision repair	1	1/98	38/3299	0.684156	0.812436	Genetic Information Processing	Replication and repair
map04113	Meiosis - yeast	2	2/98	79/3299	0.829832	0.863849	Cellular Processes	Cell growth and death
map00230	Purine metabolism	1	1/98	99/3299	0.800898	0.877908	Metabolism	Nucleotide metabolism
map03008	Ribosome biogenesis in eukaryotes	1	1/98	70/3299	0.881598	0.930575	Genetic Information Processing	Translation

## Sheet: Table S8-4
Table S8-4 Kyoto Encyclopedia of Genes and Genomes (KEGG) annotation of differentially expressed genes in MS612 (MS-5_24h_vs_MS20_24h)
Pathway ID	Description	Number	Ratio_in_study	Ratio_in_pop	Pvalue	Padjust	First Category	Second Category
map00630	Glyoxylate and dicarboxylate metabolism	8	8/130	24/3299	3.42706e-07	6.08303e-06	Metabolism	Carbohydrate metabolism
map00620	Pyruvate metabolism	9	9/130	44/3299	2.02682e-06	2.39841e-05	Metabolism	Carbohydrate metabolism
map00640	Propanoate metabolism	7	7/130	24/3299	2.50082e-06	2.21948e-05	Metabolism	Carbohydrate metabolism
map00010	Glycolysis / Gluconeogenesis	6	6/130	41/3299	1.01704e-05	0.000722098	Metabolism	Carbohydrate metabolism
map00220	Arginine biosynthesis	4	4/130	16/3299	0.000101275	0.000962115	Metabolism	Amino acid metabolism
map00061	Fatty acid biosynthesis	4	4/130	9/3299	0.00102638	0.0133119	Metabolism	Lipid metabolism
map00250	Alanine, aspartate and glutamate metabolism	5	5/130	28/3299	0.0011923	0.00849513	Metabolism	Amino acid metabolism
map04146	Peroxisome	7	7/130	45/3299	0.00162893	0.0128505	Cellular Processes	Transport and catabolism
map00260	Glycine, serine and threonine metabolism	5	5/130	38/3299	0.00325875	0.0192809	Metabolism	Amino acid metabolism
map04113	Meiosis - yeast	7	7/130	79/3299	0.00378761	0.0271543	Cellular Processes	Cell growth and death
map00360	Phenylalanine metabolism	4	4/130	21/3299	0.0065572	0.0233409	Metabolism	Amino acid metabolism
map00680	Methane metabolism	4	4/130	22/3299	0.00683787	0.0242744	Metabolism	Energy metabolism
map00071	Fatty acid degradation	4	4/130	20/3299	0.006824	0.0302815	Metabolism	Lipid metabolism
map00592	alpha-Linolenic acid metabolism	2	2/130	6/3299	0.0121205	0.0493476	Metabolism	Lipid metabolism
map00410	beta-Alanine metabolism	3	3/130	18/3299	0.015001	0.053441	Metabolism	Metabolism of other amino acids
map00330	Arginine and proline metabolism	4	4/130	26/3299	0.0175464	0.0622897	Metabolism	Amino acid metabolism
map00220	Arginine biosynthesis	3	3/130	16/3299	0.0229843	0.0709516	Metabolism	Amino acid metabolism
map04111	Cell cycle - yeast	6	6/130	97/3299	0.0365594	0.0896944	Cellular Processes	Cell growth and death
map00650	Butanoate metabolism	2	2/130	11/3299	0.0457843	0.108136	Metabolism	Carbohydrate metabolism
map01040	Biosynthesis of unsaturated fatty acids	2	2/130	16/3299	0.0547521	0.141718	Metabolism	Lipid metabolism
map00350	Tyrosine metabolism	2	2/130	20/3299	0.0617437	0.159771	Metabolism	Amino acid metabolism
map04934	Cushing syndrome	2	2/130	11/3299	0.0671541	0.164412	Human Diseases	Endocrine and metabolic diseases
map00670	One carbon pool by folate	2	2/130	15/3299	0.0713542	0.193676	Metabolism	Metabolism of cofactors and vitamins
map03030	DNA replication	4	4/130	32/3299	0.0725475	0.168787	Genetic Information Processing	Replication and repair
map00100	Steroid biosynthesis	2	2/130	17/3299	0.0889778	0.211322	Metabolism	Lipid metabolism
map00072	Synthesis and degradation of ketone bodies	1	1/130	3/3299	0.113653	0.26898	Metabolism	Lipid metabolism
map00270	Cysteine and methionine metabolism	3	3/130	40/3299	0.114192	0.260359	Metabolism	Amino acid metabolism
map00020	Citrate cycle (TCA cycle)	2	2/130	25/3299	0.153422	0.342178	Metabolism	Carbohydrate metabolism
map00230	Purine metabolism	2	2/130	33/3299	0.193517	0.381658	Metabolism	Nucleotide metabolism
map00750	Vitamin B6 metabolism	1	1/130	8/3299	0.214558	0.407661	Metabolism	Metabolism of cofactors and vitamins
map00460	Cyanoamino acid metabolism	1	1/130	8/3299	0.214558	0.407661	Metabolism	Metabolism of other amino acids
map03450	Non-homologous end-joining	1	1/130	6/3299	0.214478	0.400735	Genetic Information Processing	Replication and repair
map00910	Nitrogen metabolism	1	1/130	6/3299	0.214478	0.400735	Metabolism	Energy metabolism
map04011	MAPK signaling pathway - yeast	5	5/130	95/3299	0.223716	0.401188	Environmental Information Processing	Signal transduction
map00564	Glycerophospholipid metabolism	1	1/130	43/3299	0.231902	0.413918	Metabolism	Lipid metabolism
map00500	Starch and sucrose metabolism	2	2/130	31/3299	0.23415	0.40505	Metabolism	Carbohydrate metabolism
map00561	Glycerolipid metabolism	1	1/130	28/3299	0.241631	0.0197053	Metabolism	Lipid metabolism
map02010	ABC transporters	1	1/130	7/3299	0.245488	0.414992	Environmental Information Processing	Membrane transport
map00514	Other types of O-glycan biosynthesis	1	1/130	12/3299	0.245488	0.414992	Metabolism	Glycan biosynthesis and metabolism
map00565	Ether lipid metabolism	1	1/130	8/3299	0.275284	0.444208	Metabolism	Lipid metabolism
map04933	AGE-RAGE signaling pathway in diabetic complications	1	1/130	8/3299	0.275284	0.444208	Human Diseases	Endocrine and metabolic diseases
map00040	Pentose and glucuronate interconversions	1	1/130	12/3299	0.304124	0.495179	Metabolism	Carbohydrate metabolism
map04928	Parathyroid hormone synthesis, secretion and action	1	1/130	9/3299	0.303911	0.469081	Organismal Systems	Endocrine system
map04625	C-type lectin receptor signaling pathway	1	1/130	10/3299	0.331416	0.50065	Organismal Systems	Immune system
map05226	Gastric cancer	1	1/130	10/3299	0.331416	0.50065	Human Diseases	Cancers: Specific types
map04926	Relaxin signaling pathway	1	1/130	10/3299	0.331416	0.50065	Organismal Systems	Endocrine system
map00740	Riboflavin metabolism	1	1/130	11/3299	0.357843	0.508136	Metabolism	Metabolism of cofactors and vitamins
map00600	Sphingolipid metabolism	1	1/130	13/3299	0.407625	0.546064	Metabolism	Lipid metabolism
map00920	Sulfur metabolism	1	1/130	18/3299	0.419715	0.598093	Metabolism	Energy metabolism
map03410	Base excision repair	1	1/130	18/3299	0.419715	0.560809	Genetic Information Processing	Replication and repair
map00310	Lysine degradation	1	1/130	15/3299	0.453576	0.575069	Metabolism	Amino acid metabolism
map05225	Hepatocellular carcinoma	1	1/130	15/3299	0.453576	0.575069	Human Diseases	Cancers: Specific types
map05165	Human papillomavirus infection	2	2/130	38/3299	0.445565	0.575184	Human Diseases	Infectious diseases: Viral
map00563	Glycosylphosphatidylinositol (GPI)-anchor biosynthesis	1	1/130	22/3299	0.486029	0.644271	Metabolism	Glycan biosynthesis and metabolism
map00280	Valine, leucine and isoleucine degradation	1	1/130	16/3299	0.529843	0.611952	Metabolism	Amino acid metabolism
map00760	Nicotinate and nicotinamide metabolism	1	1/130	19/3299	0.53513	0.61281	Metabolism	Metabolism of cofactors and vitamins
map05167	Kaposi sarcoma-associated herpesvirus infection	1	1/130	18/3299	0.515951	0.62089	Human Diseases	Infectious diseases: Viral
map00340	Histidine metabolism	1	1/130	18/3299	0.515951	0.62089	Metabolism	Amino acid metabolism
map03420	Nucleotide excision repair	1	1/130	38/3299	0.515951	0.62089	Genetic Information Processing	Replication and repair
map00330	Arginine and proline metabolism	1	1/130	26/3299	0.544833	0.690122	Metabolism	Amino acid metabolism
map05163	Human cytomegalovirus infection	1	1/130	21/3299	0.571255	0.633736	Human Diseases	Infectious diseases: Viral
map00520	Amino sugar and nucleotide sugar metabolism	1	1/130	33/3299	0.632152	0.666652	Metabolism	Carbohydrate metabolism
map00480	Glutathione metabolism	1	1/130	25/3299	0.635355	0.694004	Metabolism	Metabolism of other amino acids
map04218	Cellular senescence	1	1/130	25/3299	0.635355	0.694004	Cellular Processes	Cell growth and death
map04139	Mitophagy - yeast	1	1/130	39/3299	0.693648	0.806897	Cellular Processes	Transport and catabolism
map03022	Basal transcription factors	1	1/130	32/3299	0.725475	0.768787	Genetic Information Processing	Transcription
map04144	Endocytosis	1	1/98	65/3299	0.861891	0.926939	Cellular Processes	Transport and catabolism
map03013	RNA transport	1	1/130	81/3299	0.915687	0.915687	Genetic Information Processing	Translation
map04138	Autophagy - yeast	1	1/130	76/3299	0.954564	0.968201	Cellular Processes	Transport and catabolism
map00240	Pyrimidine metabolism	1	1/130	70/3299	0.941848	0.969148	Metabolism	Nucleotide metabolism
map04714	Thermogenesis	2	2/130	87/3299	0.971133	0.971133	Organismal Systems	Environmental adaptation
